# Supplementary material
Source: PubMed Central journal article supplement (PMC3256660)
Supplement: supp_194.2.253_TableS1_FigS1-S6.pdf [file supp_194.2.253_TableS1_FigS1-S6.pdf]

TABLE S1. *E. coli* K-12 strains

| ENZ  | Genotype                                                                              | Source (reference) |
|------|---------------------------------------------------------------------------------------|--------------------|
| 535  | F <sup>-</sup> <i>rph-1 ilvG rfb-50 phnE</i>                                          | MG1655 (21)        |
| 985  | As 535 but <i>rpoS359::Tn10</i>                                                       | (21)               |
| 1698 | As 535 but <i>rpoS::kan</i>                                                           | (11)               |
| 1755 | As 535 but $\Delta(\textit{phoB-R})\textit{kan}$                                      | (21)               |
| 1791 | As 535 but $\Delta\textit{lacY::kan}$                                                 | P1.JW334           |
| 1797 | As 535 but <i>lacY::Tn10</i>                                                          | This study         |
| 1901 | Evolved 535 RpoS <sup>-</sup>                                                         | This study         |
| 1902 | Evolved 535 Glg <sup>-</sup>                                                          | This study         |
| 1903 | Evolved 535 Glg <sup>+</sup>                                                          | This study         |
| 1904 | Evolved 535 Glg <sup>+</sup>                                                          | This study         |
| 1905 | Evolved 535 Glg <sup>+</sup>                                                          | This study         |
| 1944 | As 535 but $\Delta\textit{rpoS::kan}$                                                 | P1.JW5437          |
| 1946 | As 1944 (535 $\Delta\textit{rpoS}$ ) Km <sup>s</sup>                                  | This study         |
| 1984 | As1905 but $\Delta\textit{lacY::kan}$                                                 | P1.JW334           |
| 2000 | As 1901 but $\Delta\textit{lacY::kan}$                                                | P1.JW334           |
| 2001 | As 1902 but $\Delta\textit{lacY::kan}$                                                | P1.JW334           |
| 2002 | As 1903 but $\Delta\textit{lacY::kan}$                                                | P1.JW334           |
| 2005 | As 1944 (535 $\Delta\textit{rpoS::kan}$ ) but <i>cysC95::Tn10</i>                     | This study         |
| 2015 | As 1901 but $\Delta(\textit{phoB-R})\textit{kan}$                                     | P1.1755            |
| 2020 | As 1946 (535 $\Delta\textit{rpoS}$ ) but $\Delta\textit{lacY::kan}$                   | P1.JW334           |
| 2039 | As 535 but <i>rpoS819</i>                                                             | This study         |
| 2041 | As 535 but <i>rpoS1901</i>                                                            | This study         |
| 2063 | As 2039 (535 <i>rpoS819</i> ) but $\Delta\textit{lacY::kan}$                          | P1.JW334           |
| 2065 | As 2041 (535 <i>rpoS1901</i> ) but $\Delta\textit{lacY::kan}$                         | P1.JW334           |
| 2075 | As 535 but $\Delta\textit{phoB::kan}$                                                 | P1.JW389           |
| 2079 | As 1901 but $\Delta\textit{phoB::kan}$                                                | P1.JW389           |
| 2084 | As 2075 (535 $\Delta\textit{phoB}$ ) Km <sup>s</sup>                                  | This study         |
| 2255 | As 535 but $\Delta\textit{proP::kan}$ MePn <sup>-</sup>                               | This study         |
| 2256 | As 535 but $\Delta\textit{proP::kan}$ MePn <sup>+</sup>                               | This study         |
| 2258 | As 1946 (535 $\Delta\textit{rpoS}$ ) but $\Delta\textit{proP::kan}$ MePn <sup>-</sup> | This study         |
| 2259 | As 1946 (535 $\Delta\textit{rpoS}$ ) but $\Delta\textit{proP::kan}$ MePn <sup>+</sup> | This study         |
| 2260 | As 1901 but $\Delta\textit{pstA::kan}$                                                | P1.JW3704          |
| 2263 | As 2041 (535 <i>rpoS1901</i> ) but $\Delta\textit{proP::kan}$ MePn <sup>+</sup>       | This study         |
| 2265 | As 2041 (535 <i>rpoS1901</i> ) but $\Delta\textit{proP::kan}$ MePn <sup>-</sup>       | This study         |
| 2268 | As 1901 but $\Delta\textit{phnK::kan}$ GPS <sup>+</sup> MePn <sup>-</sup>             | P1.JW5727          |
| 2271 | As 1901 but $\Delta\textit{phnE::kan}$                                                | P1.JW4065          |
| 2274 | As 2271 (1901 $\Delta\textit{phnE::kan}$ ) Km <sup>s</sup>                            | This study         |
| 2277 | As 2274 (1901 $\Delta\textit{phnE}$ ) but $\Delta\textit{pstA::kan}$                  | P1.JW3704          |
| 2278 | As 2274 (1901 $\Delta\textit{phnE}$ ) but $\Delta\textit{phoE::kan}$                  | P1.JW231           |
| 2282 | As 1901 but <i>lacY::Tn10</i>                                                         | P1.1797            |

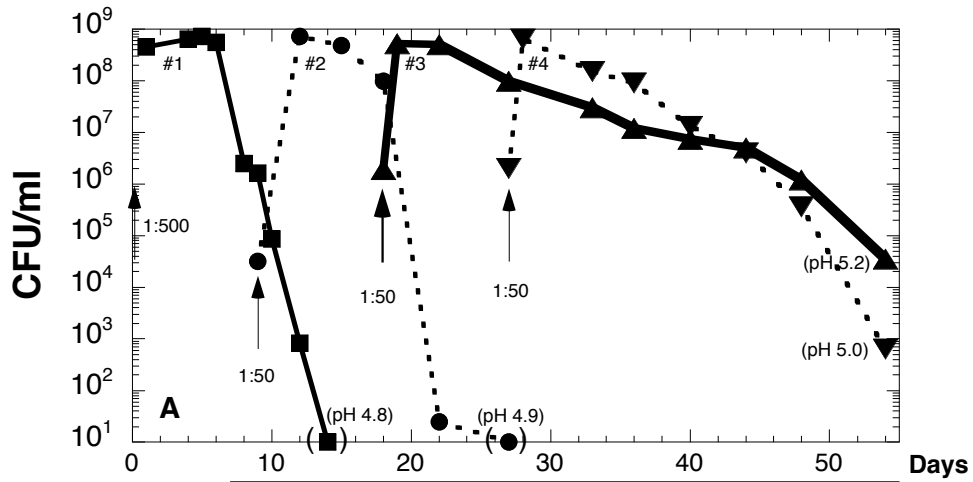

(i)

|              |      |    |      |     |     |     |     |     |     |   |
|--------------|------|----|------|-----|-----|-----|-----|-----|-----|---|
| <b>RpoS-</b> | 2-d9 | ▲  | ▲    | ▲   | ▲   | ▲   | ▲   | ▲   | ▲   | ▲ |
| <b>Glg-</b>  | 1    | 0  | 0    | 0   | 0   | 0   | 0   | 0   | 0   | 0 |
| <b>Glg+</b>  | 5    | 0  | 0    | 0   | 0   | 0   | 0   | 0   | 0   | 0 |
| <b>RpoS-</b> | 3-d1 | d4 | d9   | d15 | d18 | d22 | d26 | d30 | d36 |   |
| <b>Glg-</b>  | 2    | 5  | 2    | 6   | 6   | 6   | 6   | 6   | 6   |   |
| <b>Glg-</b>  | 0    | 0  | 1    | 0   | 0   | 0   | 0   | 0   | 0   | 1 |
| <b>Glg+</b>  | 4    | 1  | 3    | 0   | 0   | 0   | 0   | 0   | 0   | 0 |
| <b>RpoS-</b> |      |    | 4-d1 | d6  | d9  | d13 | d17 | d21 | d27 |   |
| <b>Glg-</b>  |      |    | 4    | 0   | 0   | 3   | 6   | 6   | 4   |   |
| <b>Glg-</b>  |      |    | 0    | 0   | 0   | 0   | 0   | 0   | 2   |   |
| <b>Glg+</b>  |      |    | 2    | 6   | 6   | 3   | 0   | 0   | 0   |   |

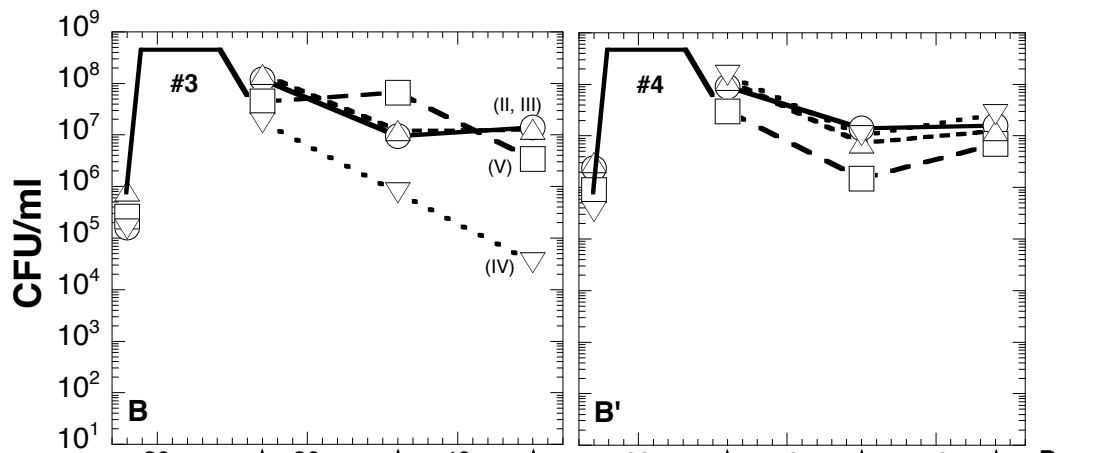

|       |              |     |     |     |     |     |     |
|-------|--------------|-----|-----|-----|-----|-----|-----|
| (ii)  | pH           | 6.8 | 6.8 | 6.9 | 6.8 | 6.8 | 6.8 |
|       | <b>RpoS-</b> | 0   | 0   | 0   | 0   | 0   | 0   |
|       | <b>Glg-</b>  | 12  | 12  | 0   | 12  | 12  | 0   |
|       | <b>Glg+</b>  | 0   | 0   | 12  | 0   | 0   | 12  |
| (iii) | pH           | 6.8 | 6.8 | 6.9 | 6.8 | 6.8 | 6.8 |
|       | <b>RpoS-</b> | 0   | 0   | 0   | 0   | 0   | 0   |
|       | <b>Glg-</b>  | 12  | 10  | 0   | 12  | 8   | 0   |
|       | <b>Glg+</b>  | 0   | 2   | 12  | 0   | 4   | 12  |
| (iv)  | pH           | 5.3 | 5.3 | 5.3 | 6.8 | 6.8 | 6.8 |
|       | <b>RpoS-</b> | 0   | 0   | 0   | 0   | 0   | 0   |
|       | <b>Glg-</b>  | 12  | 6   | 10  | 12  | 10  | 2   |
|       | <b>Glg+</b>  | 0   | 6   | 2   | 0   | 2   | 10  |
| (v)   | pH           | 5.7 | 6.8 | 6.9 | 5.6 | 5.4 | 6.8 |
|       | <b>RpoS-</b> | 11  | 0   | 10  | 6   | 12  | 2   |
|       | <b>Glg-</b>  | 1   | 0   | 0   | 2   | 0   | 1   |
|       | <b>Glg+</b>  | 0   | 12  | 2   | 4   | 0   | 9   |

1904/05

1901  
1902  
1903

FIG. S1

FIG. S1. Adaptive evolution of *E. coli* K-12 under Pi starvation conditions. Strain ENZ535 was diluted 1:50 into fresh Pi-limiting medium every 9 days of incubation and incubated further for up to 36 days. Five independent experiments (I-V) are shown. (A) The values (CFU/ml) for experiment (I) are from Fig. 1. The numbers of colonies (total 6) exhibiting either an RpoS<sup>-</sup>, Glg<sup>-</sup>, or Glg<sup>+</sup> phenotype are indicated below the figure. (B and B') For the experiments (II-V), the values for the subcultures #3 and #4 are shown in panels B and B', respectively. The pH of the spent media and the number of colonies (total 12) exhibiting either an RpoS<sup>-</sup>, Glg<sup>-</sup>, or Glg<sup>+</sup> phenotype are indicated below the figures. Strains ENZ1901 (RpoS<sup>-</sup>), ENZ1902 (Glg<sup>-</sup>), ENZ1903 (Glg<sup>+</sup>) in experiment V, and strains ENZ1904 and ENZ1905 (Glg<sup>+</sup>) in experiments II were isolated on day 27 of incubation in subcultures #4.

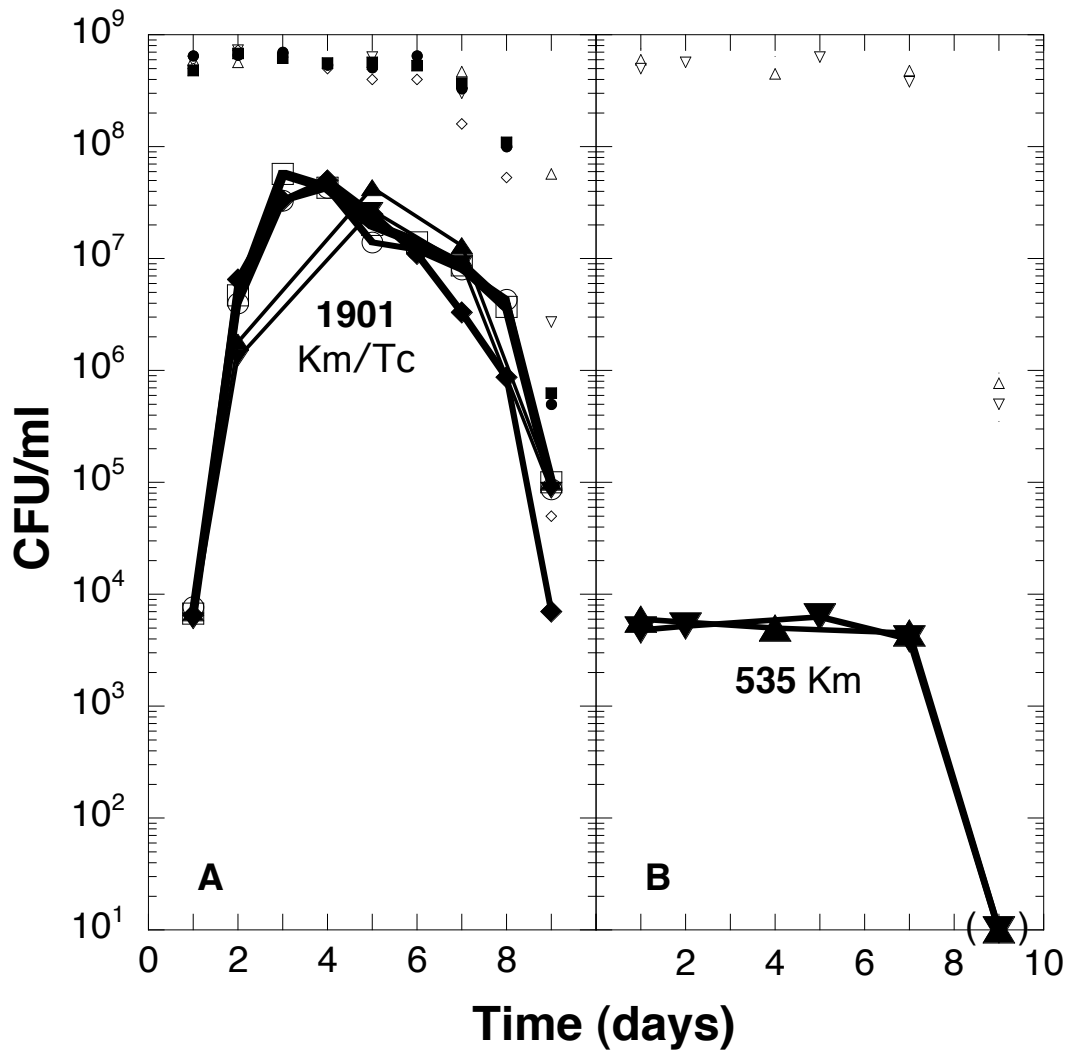

FIG. S2. The evolved strain ENZ1901 grows in a culture of *E. coli* K-12 starved for Pi. The strains tested as a minority in mixed cultures were grown as monocultures in Pi-limiting medium for 1 day, diluted  $10^3$ -fold, added (0.5 ml) into 50 ml of 1-day-old cultures of the ancestral strain ENZ535 in Pi-limiting medium, and incubated further for 8 days. (A) Evolved strain ENZ1901 (Km<sup>r</sup>: ENZ2000) as a minority (▲, ▼, ◆) with ancestral strain ENZ535 (Tc<sup>r</sup>: ENZ1797) as a majority (△, ▽, ◇), and evolved strain ENZ1901 (Tc<sup>r</sup>: ENZ2282) as a minority (○, □) with ancestral strain ENZ535 (Km<sup>r</sup>: ENZ1791) as a majority (●, ■). (B) Ancestral strain ENZ535 (Km<sup>r</sup>: ENZ1791) as a minority (▲, ▼) with ancestral strain ENZ535 (Tc<sup>r</sup>: ENZ1797) as a majority (△, ▽).

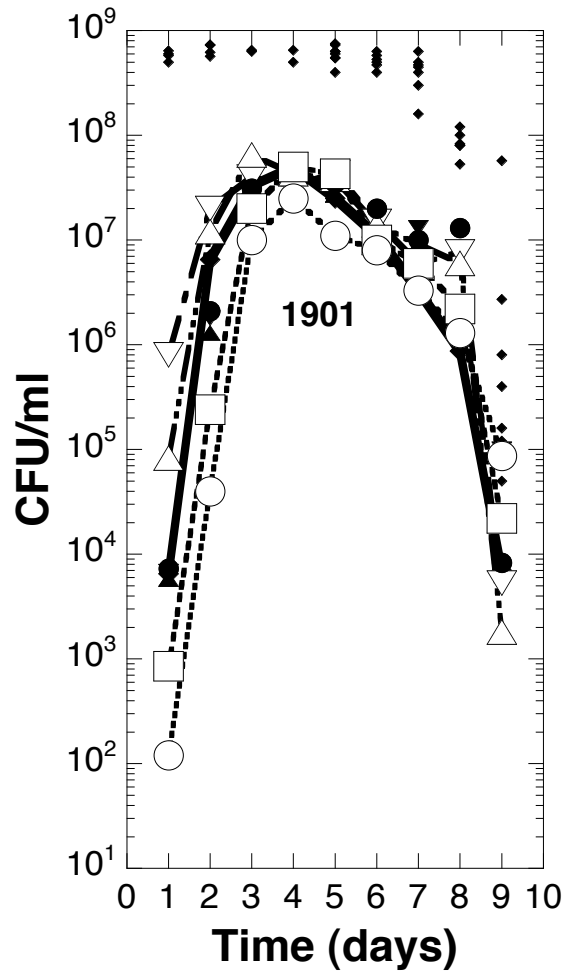

FIG. S3. Growth of the evolved strain ENZ1901 in mixed culture. The evolved strain ENZ1901 ( $Km^r$ : ENZ2000) was grown for 1 day in Pi-limiting medium, serially diluted ( $10^1$ - $10^5$ -fold) ( $\nabla$ ,  $\triangle$ ,  $\bullet$  and  $\blacktriangle$ ,  $\square$ ,  $\circ$ ), and 0.5 ml samples were added into 50 ml of 1-day-old cultures of the ancestral strain ENZ535 ( $Tc^r$ : ENZ1797) ( $\blacklozenge$ ) in Pi-limiting medium, and incubated further for 8 days.

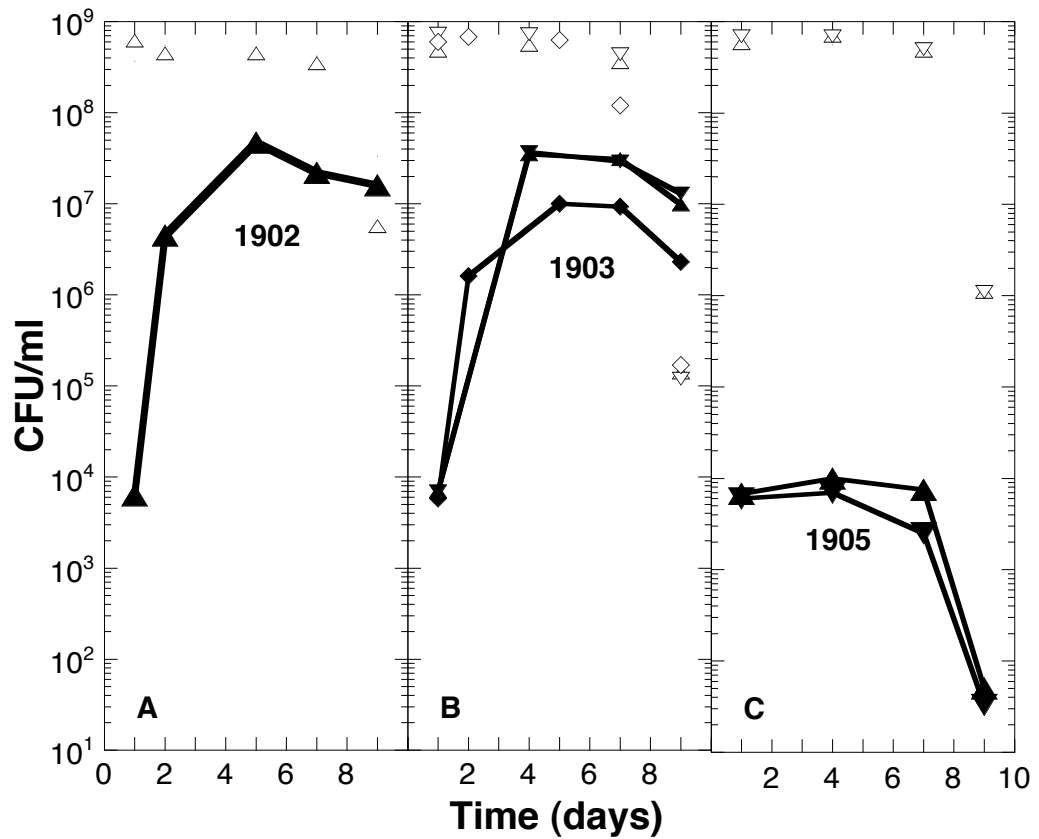

FIG. S4. Evolved strains in mixed culture. The evolved strains were grown as monocultures in Pi-limiting medium for 1 day, diluted 10<sup>3</sup>-fold, added (0.5 ml) into 50 ml of 1-day-old cultures of the ancestral strain ENZ535 (Tc<sup>r</sup>: ENZ1797) (open symbols) in Pi-limiting medium, and incubated further for 8 days. (A) Evolved strain ENZ1902 (Glg<sup>-</sup>) (Km<sup>r</sup>: ENZ2001) (▲). (B) Evolved strain ENZ1903 (Glg<sup>+</sup>) (Km<sup>r</sup>: ENZ2002) (▲, ▼, ◆). (C) Evolved strain ENZ1905 (Glg<sup>+</sup>) (Km<sup>r</sup>: ENZ1984) (▲, ▼).

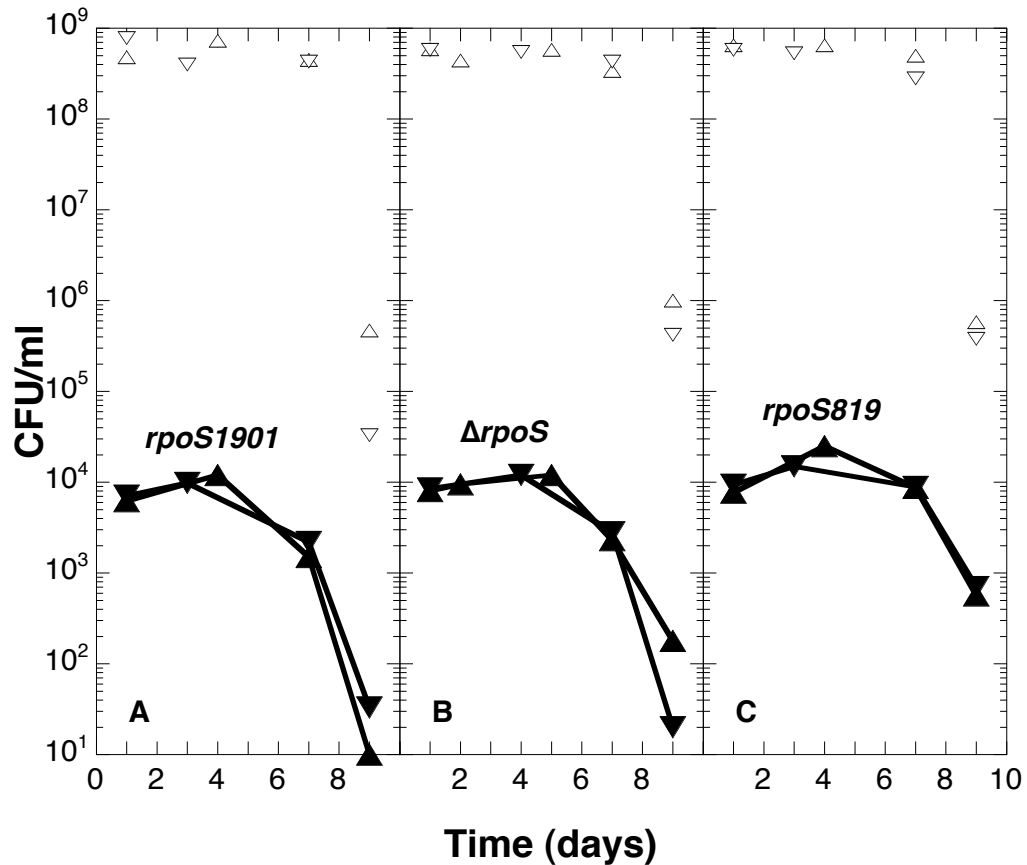

FIG. S5. ENZ535 carrying the *rpoS1901* allele alone does not grow in a mixed culture containing the ancestral strain ENZ535 in excess. The re-constructed strains (solid symbols) were grown as monocultures in Pi-limiting medium for 1 day, diluted 10<sup>3</sup>-fold, added (0.5 ml) into 50 ml of 1-day-old cultures of the ancestral strain ENZ535 (Tc<sup>r</sup>: ENZ1797) in Pi-limiting medium (△, ▽), and incubated further for 8 days. (A) ENZ535 carrying the *rpoS1901* allele (Km<sup>r</sup>: ENZ2065) (▲, ▼). (B) ENZ535 carrying the  $\Delta rpoS$  allele (Km<sup>r</sup>: ENZ2020) (▲, ▼). (C) ENZ535 carrying the *rpoS819* allele (Km<sup>r</sup>: ENZ2063) (▲, ▼).

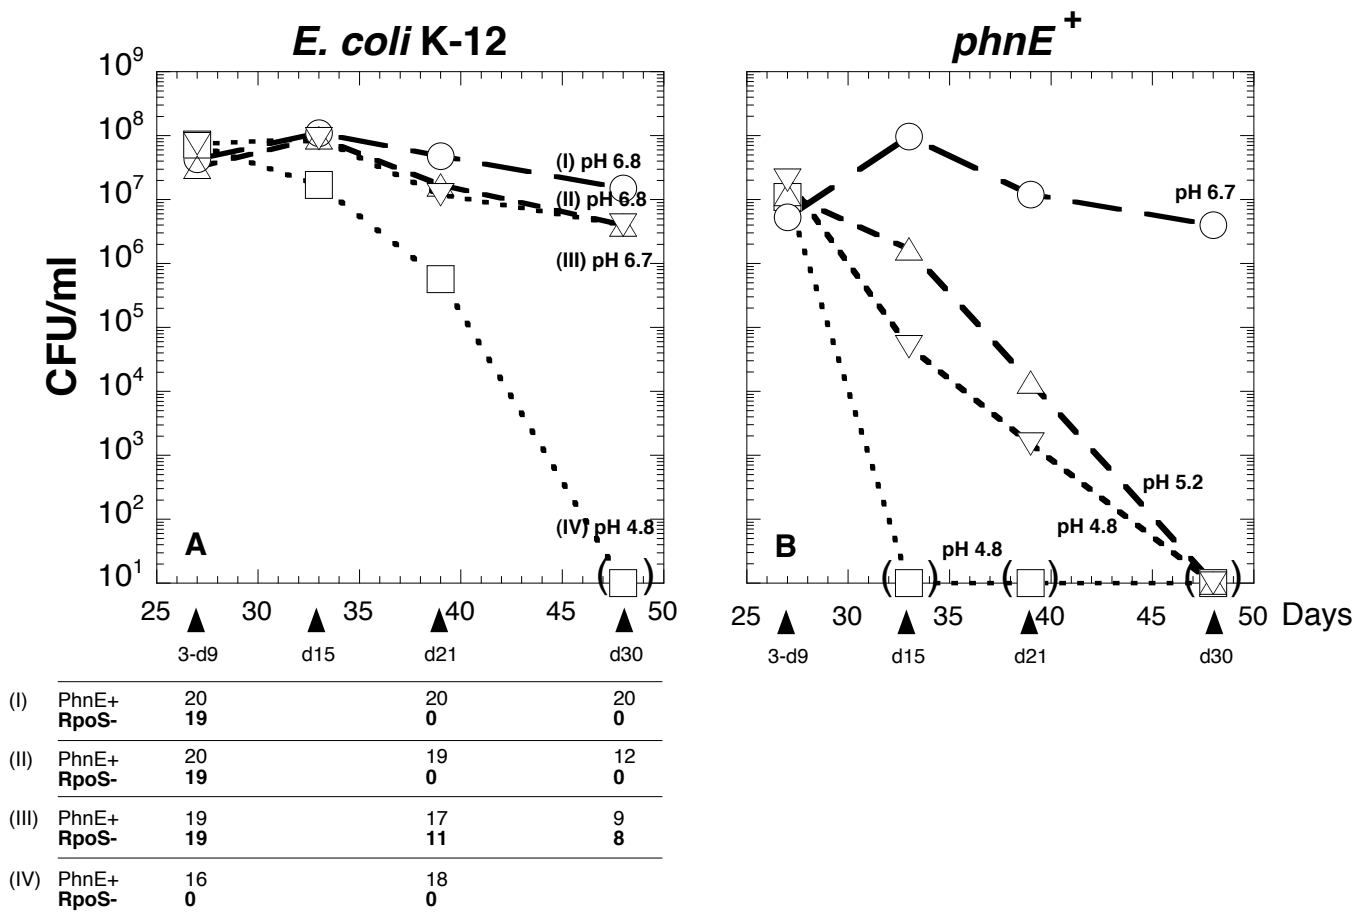

FIG. S6. Adaptive evolution of *E. coli* K-12 and of a *phnE*<sup>+</sup> derivative. Strains were diluted 1:50 into Pi-limiting medium every 9 days of incubation and incubated further for 30 days; the values for the subcultures #3 are shown. The values for 4 independent experiments are shown for each strain. (A) *E. coli* K-12 (ENZ2255). The numbers of colonies (total 20) exhibiting a PhnE<sup>+</sup> and/or an RpoS<sup>-</sup> phenotype are indicated below the figure. (B) *E. coli* K-12 *phnE*<sup>+</sup> (ENZ2256). The population that survived on day 30 of incubation (○) contained PhnE<sup>+</sup> cells (20/20).
